# Supplementary material for: Antitumour activity of neratinib in patients with HER2-mutant advanced biliary tract cancers
Source: PubMed Central journal article supplement (PMC9902444; doi:10.1038/s41467-023-36399-y), 2023-02-06
Supplement: 41467_2023_36399_MOESM1_ESM.pdf [file 41467_2023_36399_MOESM1_ESM.pdf]

## Supplementary information

**Supplementary Table 1 Central confirmation of *HER2* mutations.**

| Patient ID | Enrolment assay                      | <i>HER2</i> mutation code | Confirmed by <i>HER2</i> targeted sequencing (Custom-seq) | Confirmed by MSK-IMPACT | Confirmed by MSK-ACCESS | Additional <i>HER2</i> mutations found | Best objective response |
|------------|--------------------------------------|---------------------------|-----------------------------------------------------------|-------------------------|-------------------------|----------------------------------------|-------------------------|
| 1          | MDA Solid Tumor Genomic Assay        | V777L                     | NA                                                        | NA                      | V777L                   |                                        | NE                      |
| 2          | Brigham and Women's in-house         | L755S                     | NA                                                        | L755S                   | NA                      |                                        | SD                      |
| 3          | Guardant360                          | V777L                     | NA                                                        | V777L <sup>a</sup>      | NA                      |                                        | PR                      |
| 4          | SNaPshot                             | V777L                     | NA                                                        | NA                      | NA                      |                                        | PD                      |
| 5          | FoundationOne                        | L755S                     | NA                                                        | NA                      | NA                      |                                        | PD                      |
| 6          | FoundationOne                        | G776C;<br>H878Y           | NA                                                        | NA                      | G776C;<br>H878Y         |                                        | SD                      |
| 7          | Guardant360                          | S310F                     | NA                                                        | NA                      | S310F <sup>a</sup>      | D277Y                                  | PD                      |
| 8          | Caris MiProfile                      | D769Y                     | NA                                                        | NA                      | D769Y                   |                                        | SD                      |
| 9          | FoundationOne                        | S310F                     | NA                                                        | NA                      | S310F                   |                                        | PD                      |
| 10         | FoundationOne                        | S310F                     | NA                                                        | NA                      | S310F                   |                                        | NE                      |
| 11         | Pangaea Sanger exon 8, 19–21         | S310F                     | NA                                                        | S310F                   | NA                      |                                        | PD                      |
| 12         | RT-PCR                               | V842I                     | Inconclusive                                              | Not confirmed           | NA                      |                                        | NE                      |
| 13         | Oncomine                             | V842I                     | NA                                                        | V842I                   | NA                      |                                        | NE                      |
| 14         | FoundationOne                        | T733I                     | NA                                                        | T733I                   | NA                      |                                        | SD                      |
| 15         | MSK-IMPACT                           | S310F                     | S310F                                                     | S310F                   | NA                      |                                        | PR                      |
| 16         | MSK-IMPACT                           | S310F                     | S310F                                                     | S310F                   | NA                      |                                        | PD                      |
| 17         | MSK-IMPACT                           | S310Y                     | NA                                                        | S310Y                   | NA                      |                                        | SD                      |
| 18         | MSK-IMPACT                           | S310Y                     | NA                                                        | S310Y                   | NA                      |                                        | SD                      |
| 19         | Peter Mac somatic panel (tissue)     | V695E                     | V695E                                                     | V695E                   | NA                      | V842I                                  | uPR                     |
| 20         | AmpliSeq comprehensive cancer panel  | S310F                     | NA                                                        | NA                      | S310F                   | L253V <sup>a</sup>                     | SD                      |
| 21         | AmpliSeq colon and lung cancer panel | V777L                     | NA                                                        | NA                      | V777L                   |                                        | PR                      |
| 22         | FoundationOne CDx                    | R678Q                     | NA                                                        | R678Q                   | NA                      |                                        | NE                      |
| 23         | FoundationOne CDx                    | S310F; V777L              | NA                                                        | S310F;<br>V777L         | NA                      |                                        | PD                      |
| 24         | FoundationOne                        | R678Q                     | NA                                                        | R678Q                   | NA                      |                                        | NE                      |
| 25         | Stanford STAMP                       | S310F                     | NA                                                        | S310F                   | NA                      |                                        | PR                      |

<sup>a</sup>Alteration at or near limit of detection of the assay, underwent manual re-review to confirm accuracy of alteration.

MDA MD Anderson, MSK-ACCESS Memorial Sloan Kettering-Analysis of Circulating cfDNA to Evaluate Somatic Status, MSK-IMPACT Integrated Mutation Profiling of Actionable Cancer Targets, NA not available, NE not evaluable, PD progressive disease, PR partial response, RT-PCR reverse transcription polymerase chain reaction, SD stable disease, STAMP Solid Tumor Actionable Mutation Panel, uPR unconfirmed partial response.

**Supplementary Table 2 Serious adverse events.**

| <b>Adverse event</b>                            | <b>Biliary tract<br/>(n=25)</b> |
|-------------------------------------------------|---------------------------------|
| Patients with ≥1 reported serious adverse event | 16 (64%)                        |
| Dehydration                                     | 3 (12%)                         |
| Abdominal pain                                  | 2 (8%)                          |
| Diarrhoea                                       | 2 (8%)                          |
| Pyrexia                                         | 2 (8%)                          |
| Sepsis                                          | 2 (8%)                          |
| Acute kidney injury                             | 1 (4%)                          |
| Anaemia                                         | 1 (4%)                          |
| Asthenia                                        | 1 (4%)                          |
| Bacteraemia                                     | 1 (4%)                          |
| Bile duct stone                                 | 1 (4%)                          |
| Blood bilirubin increased                       | 1 (4%)                          |
| Decreased appetite                              | 1 (4%)                          |
| Device-related infection                        | 1 (4%)                          |
| Encephalopathy                                  | 1 (4%)                          |
| Gallbladder obstruction                         | 1 (4%)                          |
| Gastric ulcer                                   | 1 (4%)                          |
| General physical health deterioration           | 1 (4%)                          |
| Hypotension                                     | 1 (4%)                          |
| International normalised ratio increased        | 1 (4%)                          |
| Large intestinal haemorrhage                    | 1 (4%)                          |
| Liver abscess                                   | 1 (4%)                          |
| Malnutrition                                    | 1 (4%)                          |
| Nausea                                          | 1 (4%)                          |
| Obstruction gastric                             | 1 (4%)                          |
| Respiratory failure                             | 1 (4%)                          |
| Small intestinal obstruction                    | 1 (4%)                          |
| Vomiting                                        | 1 (4%)                          |

Data are n (%).

**Supplementary Table 3 Characteristics of diarrhoea.**

| <b>Characteristic</b>                                          | <b>Biliary tract cancer<br/>(n=25)</b> |
|----------------------------------------------------------------|----------------------------------------|
| <i>Diarrhoea incidence</i>                                     |                                        |
| Any grade                                                      | 14 (56%)                               |
| Grade 1                                                        | 3 (12%)                                |
| Grade 2                                                        | 5 (20%)                                |
| Grade 3                                                        | 6 (24%)                                |
| <i>Action taken for diarrhoea</i>                              |                                        |
| Concomitant medication                                         | 10 (40%)                               |
| Leading to temporary dose hold                                 | 3 (12%)                                |
| Leading to hospitalisation                                     | 1 (4%)                                 |
| <i>Diarrhoea episodes</i>                                      |                                        |
| Median time to first grade 3 diarrhoea, days (range)           | 7 (3–28)                               |
| Median duration per episode of grade 3 diarrhoea, days (range) | 5.5 (1–56)                             |

Data are n (%) unless otherwise stated.

**Supplementary Table 4 Participating institutions and ethics committees.**

| <b>Institution</b>                                     | <b>Ethics Committee</b>                                                         |
|--------------------------------------------------------|---------------------------------------------------------------------------------|
| Memorial Sloan-Kettering Cancer Center, USA            | Memorial Sloan-Kettering Cancer Center Institutional Review Board/Privacy Board |
| Dana-Farber Cancer Institute, USA                      | Dana-Farber Cancer Institute Institutional Review Board                         |
| Washington University in St. Louis, USA                | The Washington University in St. Louis Institutional Review Board               |
| The University of Texas MD Anderson Cancer Center, USA | MD Anderson Institutional Review Board                                          |
| University of Southern California, USA                 | University of Southern California Institutional Review Board                    |
| Stanford University, USA                               | Administrative Panel on Human Subjects in Medical Research                      |
| Roswell Park Comprehensive Cancer Center, USA          | Roswell Park Comprehensive Cancer Center Institutional Review Board             |
| Mayo Clinic in Arizona, USA                            | Mayo Clinic Institutional Review Boards                                         |
| CEIC Hospital Universitari Vall d'Hebron, Spain        | Clinical Research Ethics Committee of "CEIC Hospital de Madrid"                 |
| CEIC USP Institut Universitari Dexeus, Spain           | Clinical Research Ethics Committee of "CEIC Hospital de Madrid"                 |
| CEIC Fundación Jiménez Díaz, Spain                     | Clinical Research Ethics Committee of "CEIC Hospital de Madrid"                 |
| Institut Gustave Roussy, France                        | Nord-Ouest II Independent Ethics Committee                                      |
| Centre Leon Berard, France                             | Nord-Ouest II Independent Ethics Committee                                      |
| Peter MacCallum Cancer Centre, Australia               | Peter MacCallum Cancer Centre Ethics Committee                                  |
| Davidoff Cancer Center, Israel                         | Helsinki Committee Rabin Medical Center-Beilinson Hospital                      |
| University Hospital, Rigshospitalet, Denmark           | The Capital Region of Denmark Health Centre Ethics Committee                    |
